# Supplementary material for: Predictive and Prognostic Value of Oncogene Mutations and Microsatellite Instability in Locally-Advanced Rectal Cancer Treated with Neoadjuvant Radiation-Based Therapy: A Systematic Review and Meta-Analysis
Source: MDPI journal article supplement (doi:10.3390/cancers15051469), 2023-02-25
Supplement: s1 [file s1]

# Predictive and Prognostic Value of Oncogene Mutations and Microsatellite Instability in Locally-Advanced Rectal Cancer Treated with Neoadjuvant Radiation-Based Therapy: A Systematic Review and Meta-Analysis

Elena De Mattia, Jerry Polesel, Silvia Mezzalana, Elisa Palazzari, Sara Pollesel, Giuseppe Toffoli and Erika Cecchin

## Supplementary methods

### 1. PICO framework

The PICO framework was used to guide the focus of the systemic review

**P (Patient, Problem, Population):** series including patients with primary adenocarcinoma of the rectum treated with neoadjuvant chemoradiotherapy or radiotherapy.

**I (Intervention):** Have mutation in candidate gene (i.e., *RAS*, *TP53*, *BRAF*, *PIK3CA* and *SMAD4*) or microsatellite-unstable tumor.

**C (Comparison, Control):** Have no mutations in the candidate gene (i.e., *RAS*, *TP53*, *BRAF*, *PIK3CA* and *SMAD4*) or microsatellite-stable tumor.

**O (Outcome):** Primary endpoint: pathological complete response and tumor downstaging evaluated in accordance with the international guidelines. Secondary endpoint: recurrence risk (i.e., disease-free survival or relapse-free survival) and overall survival.

### 2. Search algorithms

(chemotherapy OR radiotherapy OR “radiation therapy” OR irradiation OR chemoradiotherapy OR chemoradiation OR chemo-radiotherapy OR radio-chemotherapy) AND (“rectal cancer” OR “rectal carcinoma”) AND (mutation OR mutations OR mutated) AND (*RAS* OR *KRAS* OR *K-RAS* OR *NRAS* OR *N-RAS* OR *HRAS* OR *H-RAS* OR *BRAF* OR *BRAF* OR *PIK3CA* OR “phosphoinositide-3-kinase catalytic alpha polypeptide” OR “PIK3 catalytic alpha polypeptide” OR “phosphoinositide-3-kinase” OR *SMAD4* OR *SMAD-4* OR *TP53* OR *P53* OR *TP-53* OR *MMR* OR *dMMR* OR *pMMR* OR *MSI* OR “microsatellite instability” OR “replication error” OR “mismatch repair” OR “microsatellite repeats” OR “Genomic instability”)

**Table S1. (A)** Characteristics of included studies and **(B)** details on molecular analysis and response assessment for *KRAS* gene.

A).

| First author, Year        | Country | Total patients/ Included for analysis (n=) | Age (Years)  | M/F    | Study Type    | Enrollment interval | Stage TNM                                  | Therapy strategy                  | RT dose                                                | FLs                       | Other drug      | CRT/RT duration (days) | Interval CRT/RT to surgery (weeks)                        | NOS score |
|---------------------------|---------|--------------------------------------------|--------------|--------|---------------|---------------------|--------------------------------------------|-----------------------------------|--------------------------------------------------------|---------------------------|-----------------|------------------------|-----------------------------------------------------------|-----------|
| El Otmani et al., 2020    | Morocco | 57/57                                      | 56 (28-81)   | 32/25  | retrospective | Jan 2012- Oct 2018  | na                                         | CRT (n=39) or RT (n=18) + surgery | CRT: 45Gy/ 25 fractions; RT: 39Gy/3 fractions          | 5-FU                      | --              | 35                     | na                                                        | 7         |
| Chow et al., 2016         | USA     | 229/229                                    | 56 (21-87)   | 135/94 | retrospective | Mar 2004 - Nov 2012 | II (n=52), III (n=177)                     | CRT / intensified CRT + surgery   | 50.4Gy/28 fractions or 54.0Gy/30 fractions             | 5-FU                      | OXA             | 35-42                  | 4.6-61.4                                                  | 7         |
| Duldulao et al., 2013     | USA     | 148/148                                    | 57 (25-87)   | 85/63  | prospective   | na                  | II-III                                     | CRT / intensified CRT + surgery   | 50.4Gy                                                 | 5-FU                      | OXA             | na                     | 0-16                                                      | 7         |
| Sun et al., 2012          | China   | 63/63                                      | 64 (50-77)   | 39/24  | prospective   | Sep 2007 - Mar 2008 | II-III                                     | CRT + surgery                     | 45Gy/ 25 fractions                                     | CAPE                      | CTX             | 35 RT; 42 CT           | 6-8                                                       | 7         |
| Kim et al., 2011          | Korea   | 40/38                                      | 56.5 (34-72) | 32/8   | prospective   | May 2006 - Dec 2006 | II-III                                     | CRT + surgery                     | 50.4Gy/ 28 fractions                                   | CAPE                      | CTX, IRI        | 35 RT; 42 CT           | 4-8 median: 6.9 (4.4-12.6)                                | 7         |
| Hu-Lieskovan et al., 2011 | Europe  | 130/86                                     | 61 (33-83)   | 74/56  | retrospective | na                  | II (n=4), III (n=109), IV (n=15), na (n=2) | CRT + surgery                     | 50.4Gy/28 fractions (n=42) or 45Gy/25 fractions (n=88) | 5-FU (n=16); CAPE (n=114) | CTX, OXA (n=42) | 35 RT; 42 CT           | 4-8                                                       | 7         |
| Erben et al., 2011        | Europe  | 57/57                                      | 57 (33-80)   | 42/15  | prospective   | na                  | II-III                                     | intensified CRT + surgery         | 50.4Gy                                                 | CAPE                      | CTX, IRI        | na                     | 4-6                                                       | 7         |
| Bengala et al., 2010      | Europe  | 146/141                                    | 64 (26-78)   | 86/60  | retrospective | May 1998 - Oct 2005 | II (n=59), III (n=83)- IV (n=4)            | CRT + surgery                     | 50Gy/ 25 fractions                                     | 5-FU (n=132); CAPE (n=14) | OXA (n=34)      | 35                     | 6-8                                                       | 7         |
| Zauber et al., 2009       | Europe  | 53/53                                      | 65.0 ± 0.5   | 32/21  | retrospective | 2002 - 2006         | I-II-III                                   | CRT (n=52)/RT (n=1) + surgery     | mean dose: 49.12 ± 0.35Gy                              | 5-FU                      | --              | mean 39.2± 4.2         | 3-16 (delay of 38 weeks for one case); average 8.2 ± 4.86 | 7         |
| Gaedcke et al., 2010      | Europe  | 94/93                                      | 62.3 (35-81) | 64/30  | prospective   | Feb 1995 - Feb 2010 | II (n=31), III (n=63)                      | CRT + surgery                     | 50. Gy/28 fraction                                     | 5-FU                      | OXA (n=37)      | 35                     | 4-6                                                       | 7         |

**Abbreviations:** 5-FU, 5-fluorouracil; CAPE, capecitabine; CRT, chemoradiotherapy; CTX, cetuximab; FLs, fluoropyrimidines; IRI, irinotecan; NOS, Newcastle–Ottawa Scale; OXA, oxaliplatin; RT, radiotherapy.

B).

| First author, Year        | Biological Matrix                         | Mutation tested                                                                      | Genotyping Method                | TRG classification system | KRAS mutation (%) | Overall % of pCR |
|---------------------------|-------------------------------------------|--------------------------------------------------------------------------------------|----------------------------------|---------------------------|-------------------|------------------|
| El Otmani et al., 2020    | FFPE pre-treatment biopsy                 | exon 2 codon 12 (G12V, G12D, G12C) and 13 (G13D);<br>exon 4 codon 146 (A146T; A146V) | Sanger Sequencing/Pyrosequencing | Dworak et al.             | 28%               | 12%              |
| Chow et al., 2016         | FFPE pre-treatment biopsy                 | exon 2-3, codon 12 (G12V) and 13 (G13D)                                              | Sanger Sequencing/NGS            | na^                       | 42%               | 26%              |
| Duldulao et al., 2013     | FFPE pre-treatment biopsy                 | exon 2 and 3 (codon 6, 12, 13, 22, 61 and 64)                                        | Sanger sequencing                | AJCC                      | 41%               | 25%              |
| Sun et al., 2012          | FFPE pre-treatment biopsy                 | exon 2, codon 12-13                                                                  | Sanger sequencing                | na^^                      | 30%               | 13%              |
| Kim et al., 2011          | FFPE or fresh-frozen pre-treatment biopsy | exon 2, codon 12-13                                                                  | Sanger sequencing                | Dworak et al.             | 13%               | 21%              |
| Hu-Lieskovan et al., 2011 | FFPE pre-treatment biopsy                 | exon 2, codon 12-13                                                                  | PCR-RFLP                         | Dworak et al.             | 40%               | 12%              |
| Erben et al., 2011        | FFPE pre-treatment biopsy                 | exon 2, codon 12-13                                                                  | Sanger sequencing                | JSCCR                     | 32%               | 11%              |
| Bengala et al., 2010      | FFPE pre-treatment biopsy                 | exon 2, codon 12-14                                                                  | Sanger sequencing                | Dworak et al.             | 19%               | 15%              |
| Zauber et al., 2009       | FFPE pre-treatment biopsy                 | exon 2, codon 12-13                                                                  | Allelic sizes analysis; SSCP     | Wheeler et al.            | 34%               | 43%              |
| Gaedcke et al., 2010      | FFPE pre-treatment biopsy                 | exon 2, codon 12-13; exon 3, codon 61, exon 4, codon 146.                            | Sanger sequencing                | Gavioli et al.            | 48%               | 13%              |

^ pCR was defined as the absence of tumor cells in the surgical specimen at the primary tumor site and regional lymph nodes. .

^^ pCR was defined as the complete disappearance of all tumor cells.

**Abbreviations:** AJCC, American Joint Committee on Cancer; JSCCR, Japanese Society for Cancer of the Colon and Rectum; NGS, next-generation sequencing; pCR, pathological complete response; PCR-RFLP, polymerase chain reaction-restriction fragment length polymorphism; SSCP, single-stranded conformation polymorphism; TRG, tumor regression grade.

**Table S2.** Quality assessment of included studies for **A) KRAS** gene and **B) MSI** status.

| Study                | Selection                        |                                 |                       |                        | Comparability* | Exposure                  |                                                     |                   | Total Score (0-9) |
|----------------------|----------------------------------|---------------------------------|-----------------------|------------------------|----------------|---------------------------|-----------------------------------------------------|-------------------|-------------------|
|                      | Is the case definition adequate? | Representativeness of the cases | Selection of Controls | Definition of Controls |                | Ascertainment of exposure | Same method of ascertainment for cases and controls | Non-Response rate |                   |
| A)                   |                                  |                                 |                       |                        |                |                           |                                                     |                   |                   |
| El Otmani I,2020     | ●                                | ●                               | ●                     | ●                      | ○○             | ●                         | ●                                                   | ●                 | 7                 |
| Chow OS, 2016        | ●                                | ●                               | ●                     | ●                      | ○○             | ●                         | ●                                                   | ●                 | 7                 |
| Duldulao MP, 2013    | ●                                | ●                               | ●                     | ●                      | ○○             | ●                         | ●                                                   | ●                 | 7                 |
| Sun PL, 2012         | ●                                | ●                               | ●                     | ●                      | ○○             | ●                         | ●                                                   | ●                 | 7                 |
| Kim SY, 2011         | ●                                | ●                               | ●                     | ●                      | ○○             | ●                         | ●                                                   | ●                 | 7                 |
| Hu-Lieskovan S, 2011 | ●                                | ●                               | ●                     | ●                      | ○○             | ●                         | ●                                                   | ●                 | 7                 |
| Erben P, 2011        | ●                                | ●                               | ●                     | ●                      | ○○             | ●                         | ●                                                   | ●                 | 7                 |
| Bengala C, 2010      | ●                                | ●                               | ●                     | ●                      | ○○             | ●                         | ●                                                   | ●                 | 7                 |
| Zauber NP, 2009      | ●                                | ●                               | ●                     | ●                      | ○○             | ●                         | ●                                                   | ●                 | 7                 |
| Gaedcke J, 2009      | ●                                | ●                               | ●                     | ●                      | ○○             | ●                         | ●                                                   | ●                 | 7                 |
| B)                   |                                  |                                 |                       |                        |                |                           |                                                     |                   |                   |
| Wu Z, 2022           | ●                                | ●                               | ●                     | ●                      | ○○             | ●                         | ●                                                   | ●                 | 7                 |
| El Otmani I,2020     | ●                                | ●                               | ●                     | ●                      | ○○             | ●                         | ●                                                   | ●                 | 7                 |
| Rakıcı S Y, 2019     | ●                                | ●                               | ●                     | ●                      | ●●             | ●                         | ●                                                   | ●                 | 9                 |
| Du C, 2013           | ●                                | ●                               | ●                     | ●                      | ○○             | ●                         | ●                                                   | ●                 | 7                 |
| Zauber NP, 2009      | ●                                | ●                               | ●                     | ●                      | ○○             | ●                         | ●                                                   | ●                 | 7                 |

\* 0 point for univariate analysis; 1 point for multivariable analyses with sex and age as covariates; 2 points for multivariable analyses with other covariates in addition to sex and age.

**Table S3. A)** Characteristics of included studies and **B)** details on molecular analysis and response assessment for microsatellite instability (MSI) status.

A).

| First author, Year         | Country | Total patients/ Included for analysis (n=) | Age (Years) | M/F     | Study Type    | Enrollment interval | Stage TNM               | Therapy strategy                  | RT dose                                        | FLs                       | Other drug  | CRT/RT duration (days) | Interval CRT/RT to surgery (weeks)                        | NOS score |
|----------------------------|---------|--------------------------------------------|-------------|---------|---------------|---------------------|-------------------------|-----------------------------------|------------------------------------------------|---------------------------|-------------|------------------------|-----------------------------------------------------------|-----------|
| Wu et al., 2022            | China   | 854/150                                    | 55 (19–80)  | 611/243 | retrospective | Jan 2013 - Dec 2018 | II (n=200), III (n=654) | CRT (n=420) + surgery             | 50.0Gy/25 fractions                            | 5-FU                      | OXA (n=264) | 35                     | na                                                        | 7         |
| El Otmani et al., 2020     | Morocco | 57/57                                      | 56 (28–81)  | 32/25   | retrospective | Jan 2012 - Oct 2018 | na                      | CRT (n=39) or RT (n=18) + surgery | CRT: 45Gy/ 25 fractions; RT: 39 Gy/3 fractions | 5-FU                      | --          | 35                     | na                                                        | 7         |
| Yilmaz Rakici et al., 2019 | Turkey  | 37/37                                      | 60 (27–81)  | 21/16   | retrospective | 2013 - 2016         | II-III-IV               | CRT (n=35) or RT (n=2) + surgery  | 45 (n=3) - 50.4 (n=34) Gy/25-28 fractions      | 5-FU (n=7) or CAPE (n=28) | --          | 41 (median)            | 8,8 (median)                                              | 9         |
| Du et al., 2013            | China   | 316/316                                    | 56 (27–79)  | 177/139 | retrospective | Jan 1999 - Jan 2007 | II-III                  | RT + surgery                      | 30Gy /10 fractions                             | --                        | --          | 14                     | 3                                                         | 7         |
| Zauber et al., 2009        | USA     | 53/53                                      | 65.0 ± 0.5  | 32/21   | retrospective | 2002 - 2006         | I-II-III                | CRT (n=52) or RT (n=1) + surgery  | mean dose: 49.12 ± 0,35 Gy                     | 5-FU                      | --          | mean 39.2± 4.2         | 3-16 (delay of 38 weeks for one case); average 8.2 ± 4.86 | 7         |

**Abbreviations:** Abbreviation: 5-FU, 5-fluorouracil; CAPE, capecitabine; CRT, chemoradiotherapy; FLs, fluoropyrimidines; NOS, New-castle–Ottawa Scale; OXA, oxaliplatin; RT, radiotherapy.

B).

| First author, Year         | Biological Matrix         | Mutation tested | Genotyping Method                   | TRG classification system | KRAS mutation (%) | Overall % of pCR |
|----------------------------|---------------------------|-----------------|-------------------------------------|---------------------------|-------------------|------------------|
| Wu et al., 2022            | na                        | MMR             | MLH1, MSH2, MSH6, PMS2              | IHC                       | AJCC              | 20%              |
| El Otmani et al., 2020     | FFPE pre-treatment biopsy | MSI             | MLH1, MSH2, MSH6, PMS2              | IHC                       | Dworak et al.     | 19%              |
| Yilmaz Rakici et al., 2019 | FFPE pre-treatment biopsy | MMR             | MLH1, MSH2                          | IHC                       | Ryan et al.       | 11%              |
| Du et al., 2013            | FFPE pre-treatment biopsy | MSI             | BAT-25, BAT-26, NR-21, NR-24, NR-27 | Allelic sizes analysis    | Ryan et al.       | 8%               |
| Zauber et al., 2009        | FFPE pre-treatment biopsy | MSI             | BAT-26                              | Allelic sizes analysis    | Wheeler et al.    | 4%               |

^ pCR was defined as the absence of tumor cells in the surgical specimen at the primary tumor site and regional lymph nodes.

^^ pCR was defined as the complete disappearance of all tumor cells.

**Abbreviations:** AJCC, American Joint Committee on Cancer; IHC, immunohistochemistry; MMR, mismatch repair; MSI, microsatellite Instability; MSI-H, high-frequency MSI; pCR, patho-logical complete response; TRG, tumor regression grade.

### A. Proportion of pCR in *KRAS* wild-type

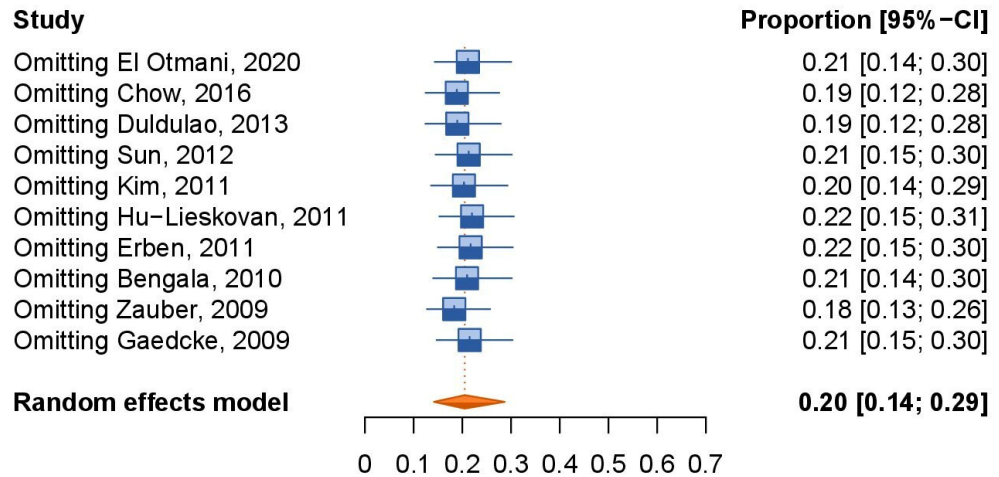

### B. Proportion of pCR in *KRAS* mutated

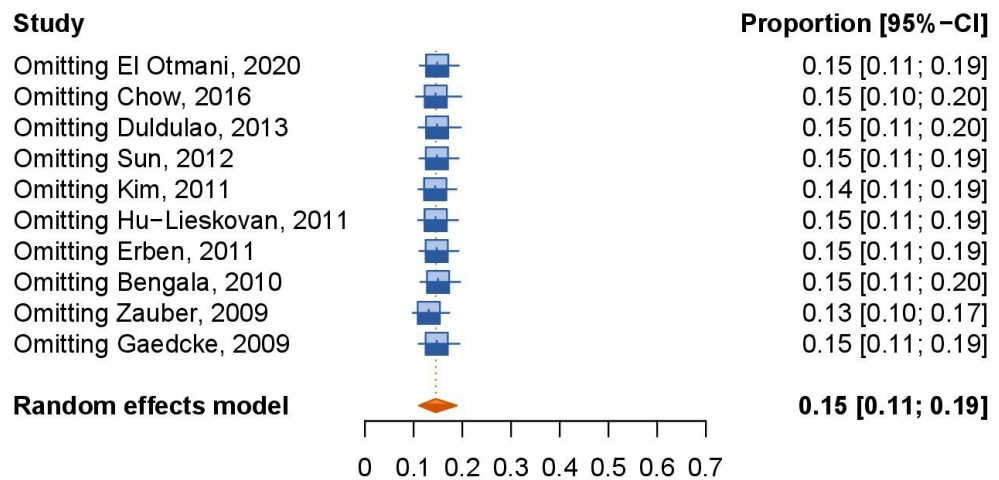

### C. Proportion of pCR in MSS/MSI-L

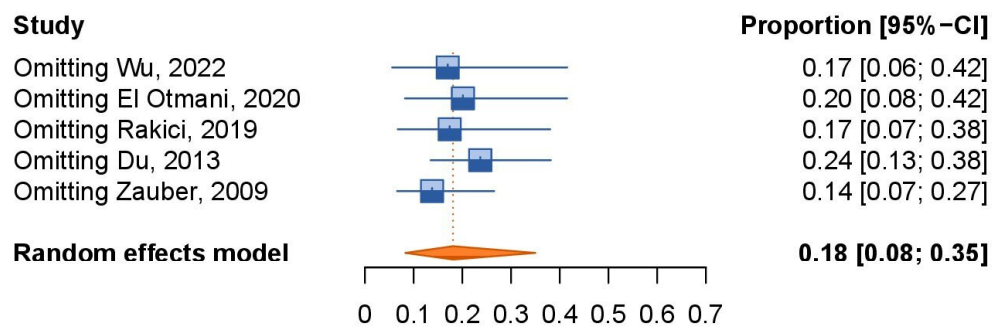

### D. Proportion of pCR in MSI-H

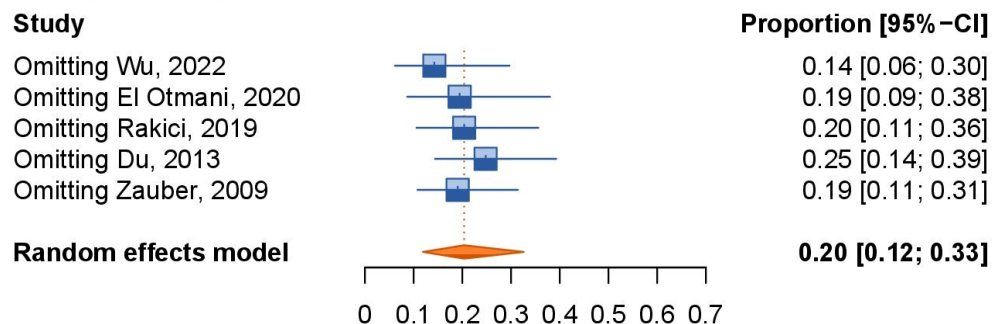

**Figure S1.** Influence analyses for percentage of pathological complete response (pCR) according to *KRAS* mutation and microsatellite status.

## A. KRAS

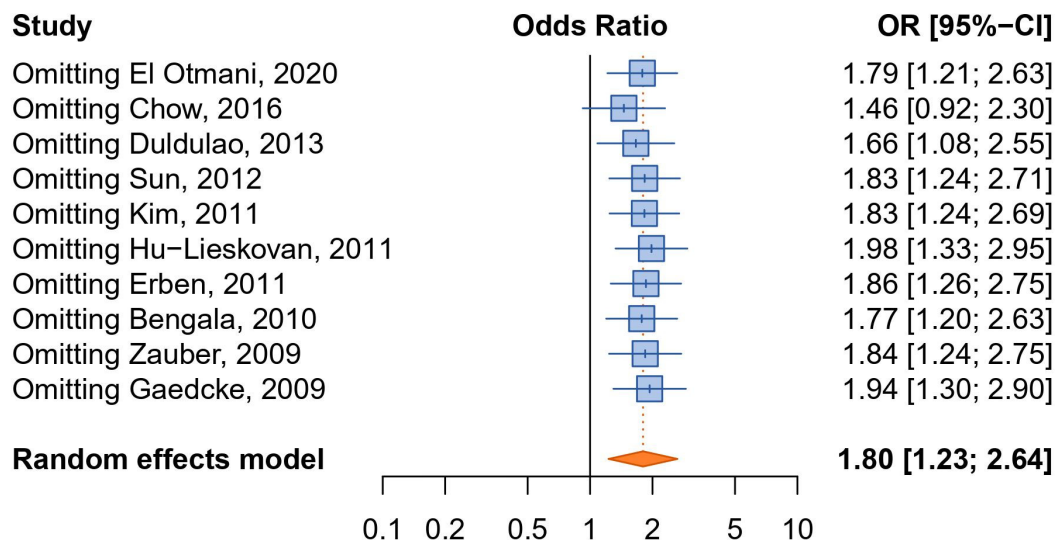

## B. Microsatellites status

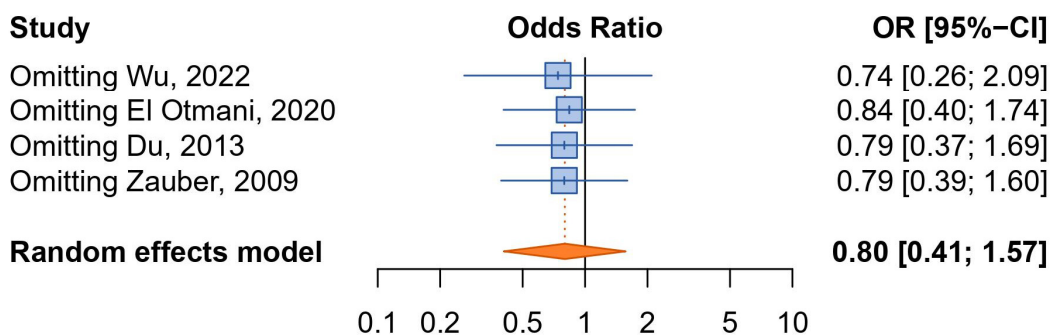

**Figure S2.** Influence analyses for the risk of not achieving a pathological complete response (pCR) according to KRAS mutation and microsatellite status.

**A. pCR in *KRAS* wild-type**

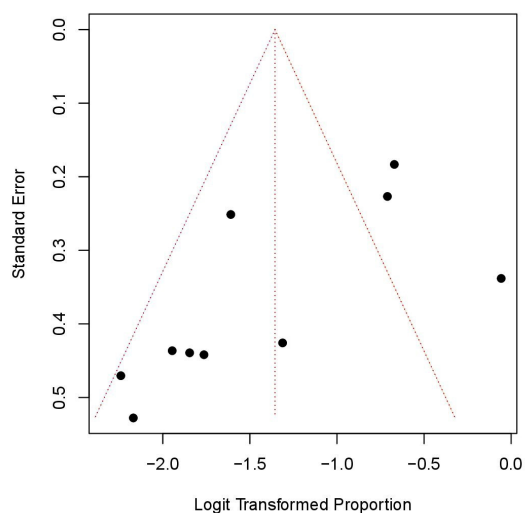

**B. pCR in *KRAS* mutated**

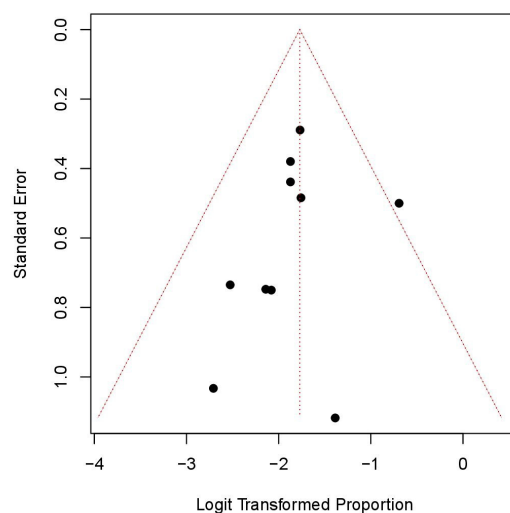

**C. pCR in MSS/MSI-L**

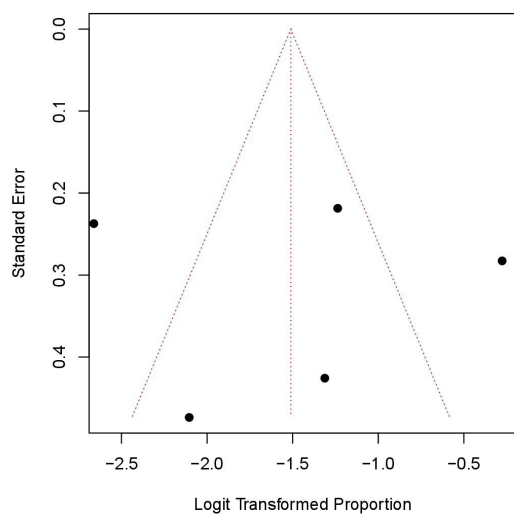

**D. pCR in MSI-H**

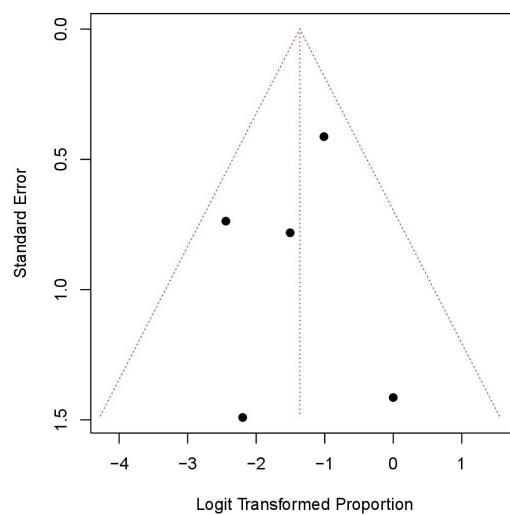

**E. OR for *KRAS* mutated vs. wild-type**

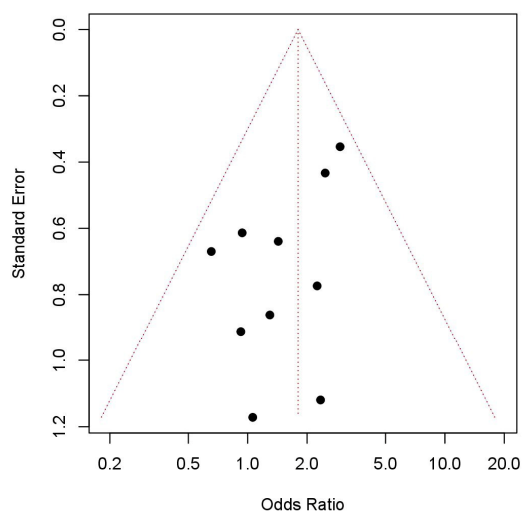

**F. OR for MSI-H vs. MSS/MSI-L**

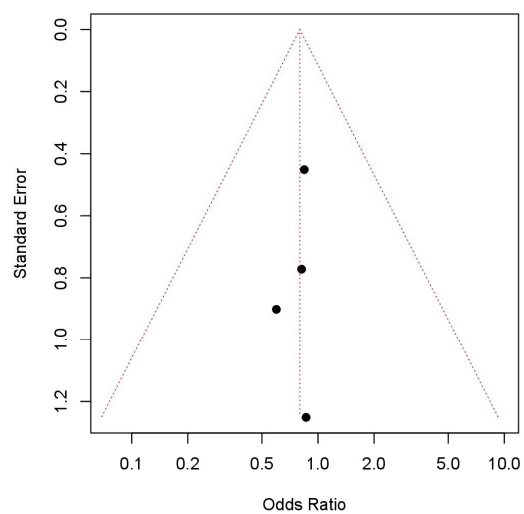

**Figure S3.** Funnel plots for publication bias.
